# Supplementary material
Source: PubMed Central journal article supplement (PMC6383568)
Supplement: NIHMS1002789-supplement-supplemental.pdf [file NIHMS1002789-supplement-supplemental.pdf]

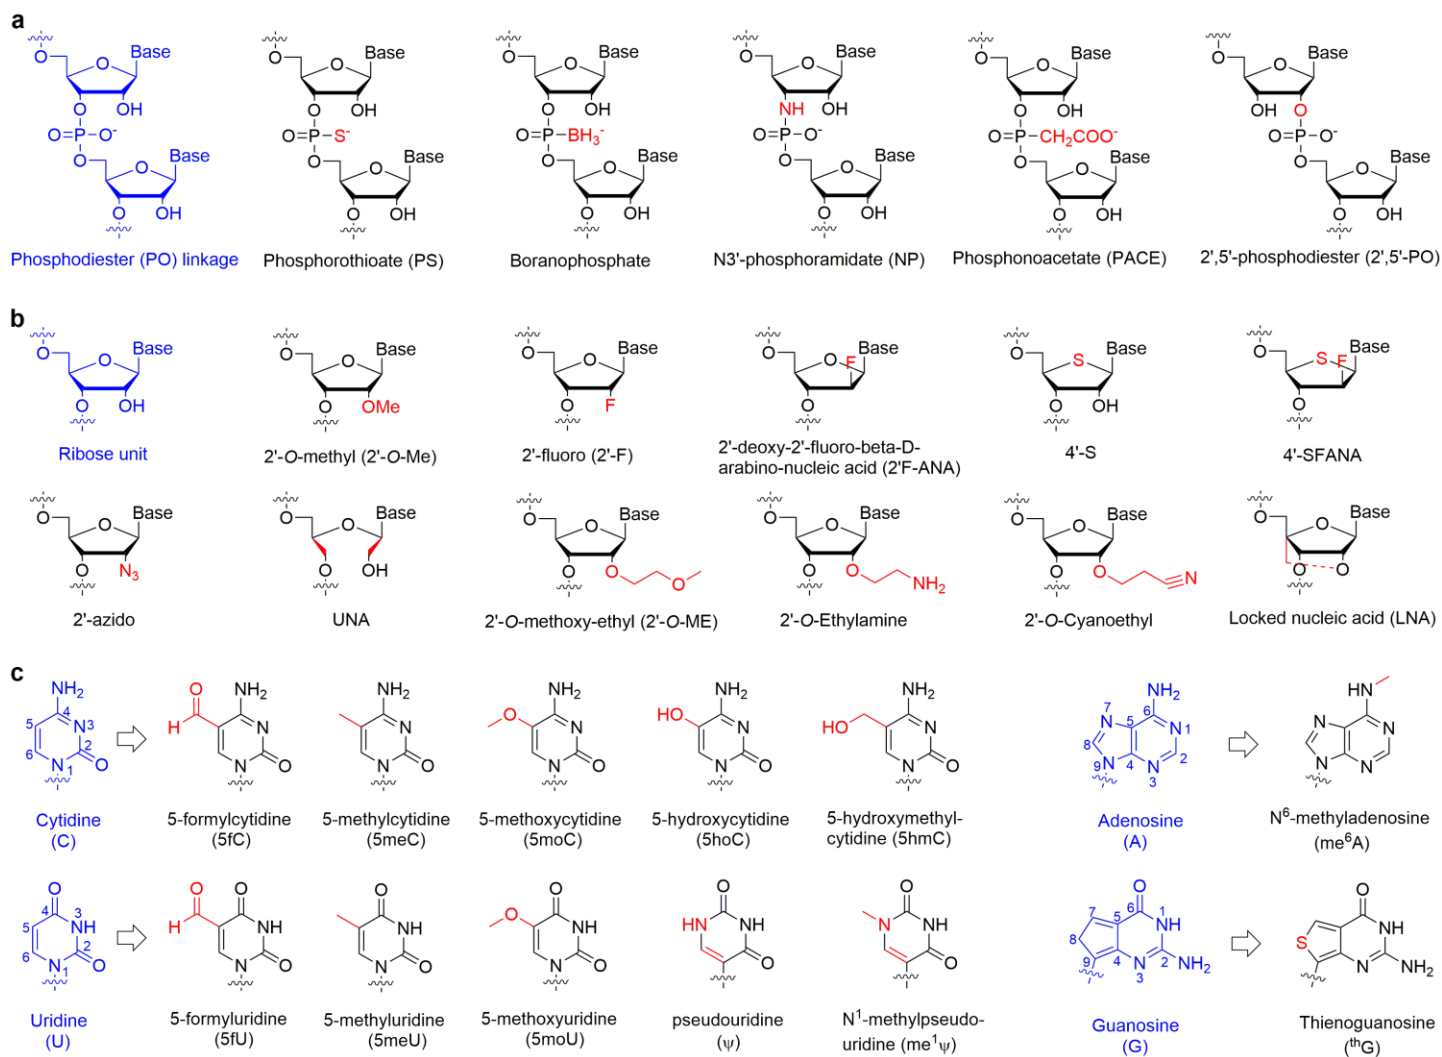

## Supplementary Figure 1

Representative examples of chemically modified nucleotides.

(a) Linkage (backbone)-modified nucleotides. (b) Ribose-modified nucleotides. (c) Nitrogenous base (cytosine, uracil, adenine, and guanine)-modified nucleotides. Natural nucleotides are shown in blue. The modified groups are shown in red.

## Supplementary Table 1 | Engineered crRNAs and their mass spectrometry data.

| No.                                               | AscrRNA      | Modification pattern (5'- to -3')            | M.W.    |         |
|---------------------------------------------------|--------------|----------------------------------------------|---------|---------|
|                                                   |              |                                              | Calcd.  | Found   |
| <b>Chemically modified crRNAs targeting DNMT1</b> |              |                                              |         |         |
| WT                                                | crWT         | UAAUUUCUACUCUUGUAGAUCUGAUGGUCCAUGUCUGUUACUC  | 13552.5 | 13552.2 |
| 1                                                 | cr42PS       | UAAUUUCUACUCUUGUAGAUCUGAUGGUCCAUGUCUGUUACUC  | 14227.0 | 14226.1 |
| 2                                                 | cr5'/3'3F2PS | UAAUUUCUACUCUUGUAGAUCUGAUGGUCCAUGUCUGUUACUC  | 13628.7 | 13627.6 |
| 3                                                 | cr5'20M      | UAAUUUCUACUCUUGUAGAU CUGAUGGUCCAUGUCUGUUACUC | 13832.5 | 13832.1 |
| 4                                                 | cr5'10M      | UAAUUUCUACUCUUGUAGAUCUGAUGGUCCAUGUCUGUUACUC  | 13692.5 | 13691.8 |
| 5                                                 | cr5'5M       | UAAUUUCUACUCUUGUAGAUCUGAUGGUCCAUGUCUGUUACUC  | 13622.5 | 13621.5 |
| 6                                                 | cr5'20F      | UAAUUUCUACUCUUGUAGAU CUGAUGGUCCAUGUCUGUUACUC | 13592.5 | 13590.6 |
| 7                                                 | cr5'10F      | UAAUUUCUACUCUUGUAGAUCUGAUGGUCCAUGUCUGUUACUC  | 13572.5 | 13570.7 |
| 8                                                 | cr5'5F       | UAAUUUCUACUCUUGUAGAUCUGAUGGUCCAUGUCUGUUACUC  | 13562.5 | 13560.9 |
| 9                                                 | crS3M3PS     | UAAUUUCUACUCUUGUAGAU CUGAUGGUCCAUGUCUGUUACUC | 13642.7 | 13643.4 |
| 10                                                | crS3F        | UAAUUUCUACUCUUGUAGAU CUGAUGGUCCAUGUCUGUUACUC | 13558.5 | 13557.9 |
| 11                                                | crS2F        | UAAUUUCUACUCUUGUAGAU CUGAUGGUCCAUGUCUGUUACUC | 13556.5 | 13557.4 |
| 12                                                | crS1F        | UAAUUUCUACUCUUGUAGAU CUGAUGGUCCAUGUCUGUUACUC | 13554.5 | 13553.6 |
| 13                                                | cr3'10M      | UAAUUUCUACUCUUGUAGAUCUGAUGGUCCAUGUCUGUUACUC  | 13692.5 | 13691.2 |
| 14                                                | cr3'5M       | UAAUUUCUACUCUUGUAGAUCUGAUGGUCCAUGUCUGUUACUC  | 13622.5 | 13621.2 |
| 15                                                | cr3'10F      | UAAUUUCUACUCUUGUAGAUCUGAUGGUCCAUGUCUGUUACUC  | 13572.5 | 13572.0 |
| 16                                                | cr3'5F       | UAAUUUCUACUCUUGUAGAUCUGAUGGUCCAUGUCUGUUACUC  | 13562.5 | 13561.4 |
| 17                                                | cr3'5F4PS    | UAAUUUCUACUCUUGUAGAUCUGAUGGUCCAUGUCUGUUACUC  | 13626.7 | 13625.8 |
| 18                                                | cr3'5U       | UAAUUUCUACUCUUGUAGAUCUGAUGGUCCAUGUCUGUUACUC  | 13626.7 | 13625.8 |
| 19                                                | cr3'5L       | UAAUUUCUACUCUUGUAGAUCUGAUGGUCCAUGUCUGUUACUC  | 13626.7 | 13625.8 |
| 20                                                | crI21F       | UAAUUUCUACUCUUGUAGAUCUGAUGGUCCAUGUCUGUUACUC  | 13594.5 | 13594.2 |
| 21                                                | crI16M5F     | UAAUUUCUACUCUUGUAGAUCUGAUGGUCCAUGUCUGUUACUC  | 13786.5 | 13783.7 |
| 22                                                | crI16M10PS5F | UAAUUUCUACUCUUGUAGAUCUGAUGGUCCAUGUCUGUUACUC  | 13947.1 | 13944.2 |
| <b>Stem-engineered crRNAs targeting DNMT1</b>     |              |                                              |         |         |
| 23                                                | crSplit-L    | UAAUUUCUACUC                                 | 3678.5  | 3677.8  |
|                                                   | crSplit-R    | UUGUAGAUCUGAUGGUCCAUGUCUGUUACUC              | 9812.1  | 9811.4  |

|    |         |                                                             |         |         |
|----|---------|-------------------------------------------------------------|---------|---------|
| 24 | crDel2  | UAAUU-CUACUCUUGUAG-UCUGAUGGUCCAUGUCUGUUACUC                 | 12917.1 | 12916.2 |
| 25 | crDel4  | UAAUUUCU--UCUU--AGAUCUGAUGGUCCAUGUCUGUUACUC                 | 12266.7 | 12266.4 |
| 26 | crDel8  | UAAUUU----UCUU----AUCUGAUGGUCCAUGUCUGUUACUC                 | 10980.9 | 10980.9 |
| 27 | crIns4  | UAAUUUCUACACUCUUGUGUAGAUCUGAUGGUCCAUGUCUGUUACUC             | 14838.3 | 14837.7 |
| 28 | crIns4' | UAAUUUCUACUCUCUUGUGUAGAUCUGAUGGUCCAUGUCUGUUACUC             | 14815.3 | 14813.5 |
| 29 | crIns6' | UAAUUUCUACUGCUCUUGCGUGUAGAUCUGAUGGUCCAUGUCUGUUACUC          | 15465.6 | 15463.9 |
| 30 | crIns8  | UAAUUUCUACACACUCUUGUGUGUAGAUCUGAUGGUCCAUGUCUGUUAC<br>UC     | 16124.1 | 16123.5 |
| 31 | crIns12 | UAAUUUCUACACACACUCUUGUGUGUGUAGAUCUGAUGGUCCAUGUCUG<br>UUACUC | 17409.8 | 17408.7 |

#### Loop-engineered crRNAs targeting DNMT1

|    |                |                                              |         |         |
|----|----------------|----------------------------------------------|---------|---------|
| 32 | FncrRNA        | UAAUUUCUACUGUUGUAGAUCUGAUGGUCCAUGUCUGUUACUC  | 13592.5 | 13593.0 |
| 33 | Lb3crRNA       | UAAUUUCUACGUUCUGUAGAUCUGAUGGUCCAUGUCUGUUACUC | 13897.7 | 13898.2 |
| 34 | BpcrRNA        | UAAUUUCUACGUAUGUAGAUCUGAUGGUCCAUGUCUGUUACUC  | 13944.7 | 13945.6 |
| 35 | Pb/Pe/LicrRNA  | UAAUUUCUACUUUGUAGAUCUGAUGGUCCAUGUCUGUUACUC   | 13553.5 | 13553.6 |
| 36 | SscrRNA        | UAAUUUCUACACGCGGUAGAUCUGAUGGUCCAUGUCUGUUACUC | 13958.7 | 13959.3 |
| 37 | Lb2/Pc/PmcrRNA | UAAUUUCUACAUUGUAGAUCUGAUGGUCCAUGUCUGUUACUC   | 13576.5 | 13577.3 |
| 38 | CMtcrRNA       | UAAUUUCUACUCUUGUAGAUCUGAUGGUCCAUGUCUGUUACUC  | 13858.7 | 13859.1 |
| 39 | EecrRNA        | UAAUUUCUACU-UUGUAGAUCUGAUGGUCCAUGUCUGUUACUC  | 13247.3 | 13247.4 |
| 40 | MbcrRNA        | UAAUUUCUACUGUUGUAGAUCUGAUGGUCCAUGUCUGUUACUC  | 13898.7 | 13898.6 |
| 41 | PdcrRNA        | UAAUUUCUACUUCGGUAGAUCUGAUGGUCCAUGUCUGUUACUC  | 13591.5 | 13592.4 |
| 42 | LbcrRNA        | AAUUUCUACUAGUGUAGAUCUGAUGGUCCAUGUCUGUUACUC   | 13638.5 | 13637.2 |

#### Chemically modified crRNAs targeting AAVSI

|    |        |                                             |         |         |
|----|--------|---------------------------------------------|---------|---------|
| WT | crWT   | UAAUUUCUACUCUUGUAGAUCUUACGAUGGAGCCAGAGAGGAU | 13763.5 | 13763.2 |
| 1  | cr3'5F | UAAUUUCUACUCUUGUAGAUCUUACGAUGGAGCCAGAGAGGAU | 13773.5 | 13772.2 |

#### Chemically modified crRNAs targeting FANCF

|    |        |                                            |         |         |
|----|--------|--------------------------------------------|---------|---------|
| WT | crWT   | UAAUUUCUACUCUUGUAGAUGUCGGCAUGGCCCAUUCGCACG | 13627.4 | 13625.6 |
| 1  | cr3'5F | UAAUUUCUACUCUUGUAGAUGUCGGCAUGGCCCAUUCGCACG | 13637.4 | 13635.6 |

| No.                                               | LbcrRNA | Modification pattern (5'- to -3')           | M.W.          |              |
|---------------------------------------------------|---------|---------------------------------------------|---------------|--------------|
| <b>Chemically modified crRNAs targeting DNMT1</b> |         |                                             | <b>Calcd.</b> | <b>Found</b> |
| WT                                                | crWT    | AAUUUCUACUAAGUGUAGAUCUGAUGGUCCAUGUCUGUUACUC | 13638.5       | 13637.2      |
| 1                                                 | cr3'5F  | AAUUUCUACUAAGUGUAGAUCUGAUGGUCCAUGUCUGUUACUC | 13648.5       | 13648.0      |

Unmodified nucleotides are shown in black. Full-length PS modifications are shown in pink. 2'-O-methyl modifications are shown in blue. 2'-F modifications are shown in red. 2'-O-methyl combined with PS modifications are shown in light blue. 2'-F combined with PS modifications are shown in green. Unlock nucleotides are shown in purple. Locked nucleotides are shown in yellow. The dashes in the stem-engineered crRNAs denote deleted nucleotides, and the orange letters denote inserted nucleotides. Red letters in the loop-engineered crRNAs denote nucleotides difference between AscrRNA and crRNAs from other 15 Cpf1 family orthologues. This table is adapted with permission from ref. 1, Nature Publishing Group.

## Reference

1. Li, B. et al. Engineering CRISPR–Cpf1 crRNAs and mRNAs to maximize genome editing efficiency. *Nature Biomedical Engineering* **1**, 0066 (2017).
